# Supplementary material for: Variation in IL-21-secreting circulating follicular helper T cells in Kawasaki disease
Source: Springer Nature journal article supplement (doi:10.1186/s12865-018-0282-8), 2018-12-01

**Figure S1**

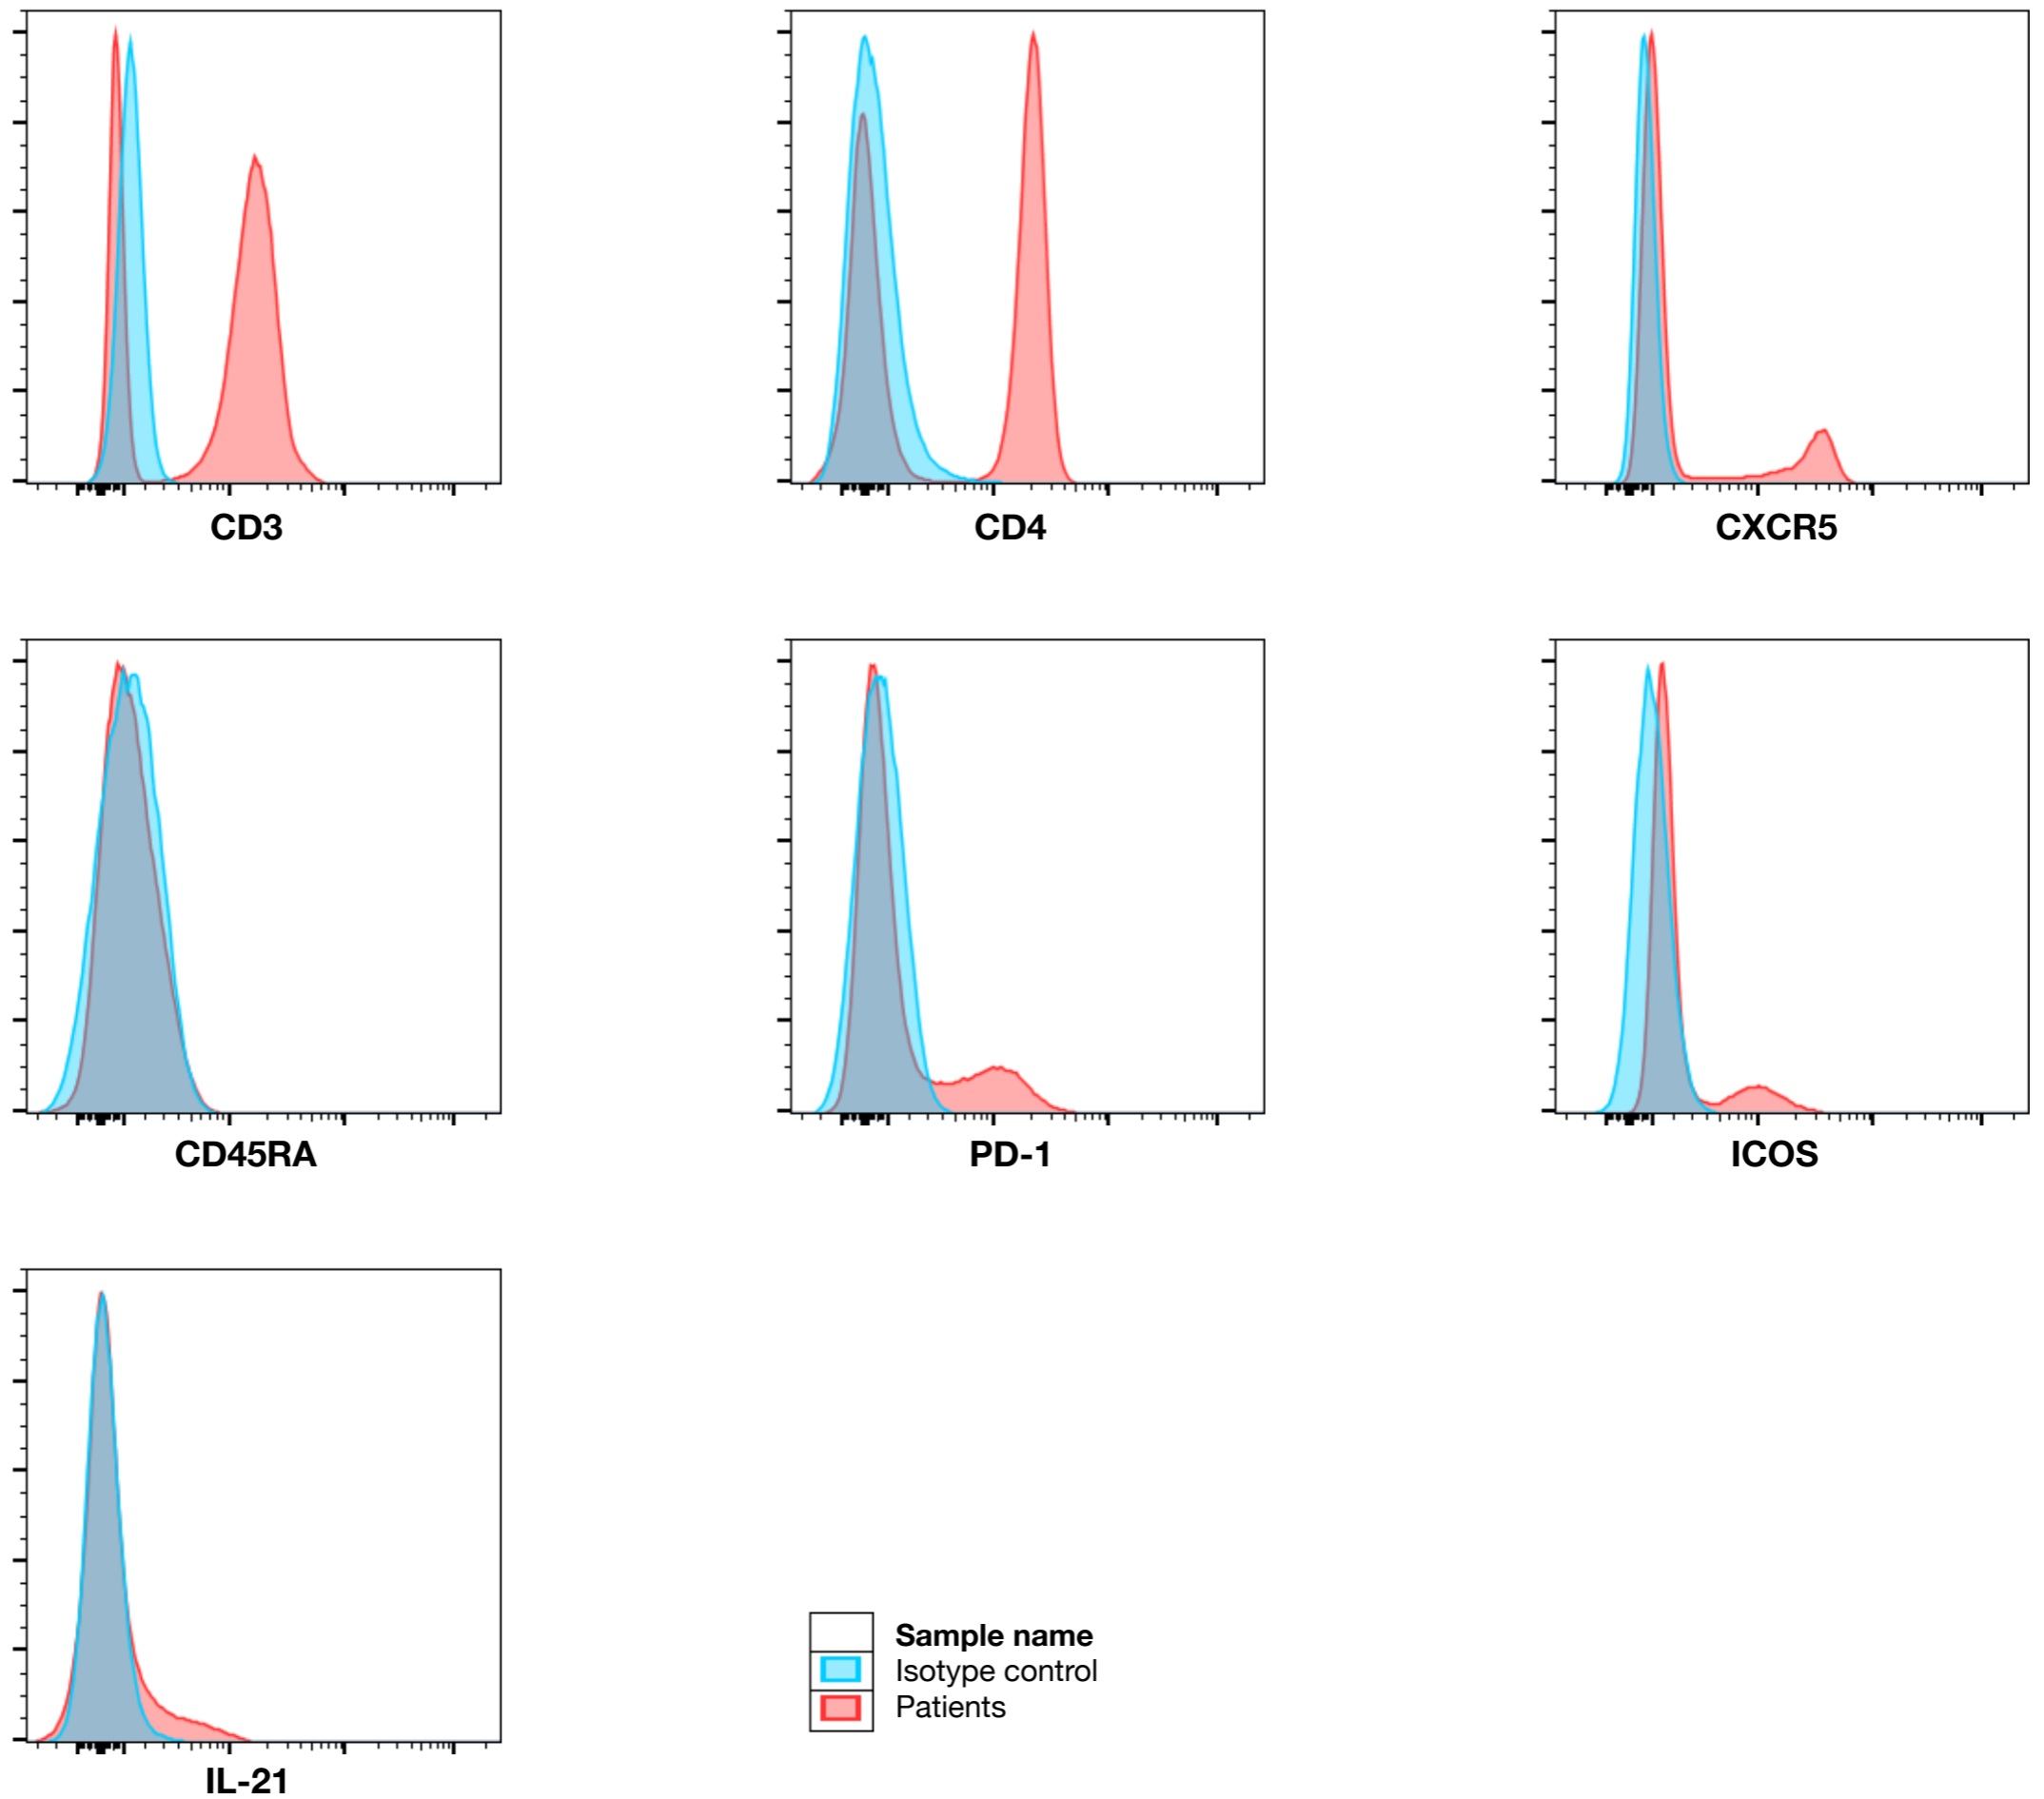

Supplement: MOESM1 [file 16359604]
